# Supplementary material
Source: Springer Nature journal article supplement (https://www.springermedizin.de/resource/supplementary/12885_2011_2824_MOESM6_ESM.pdf/9462074)

**A**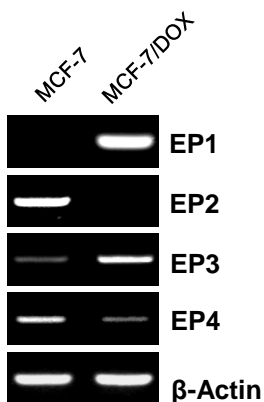**B**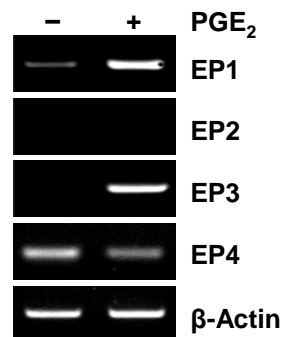**C**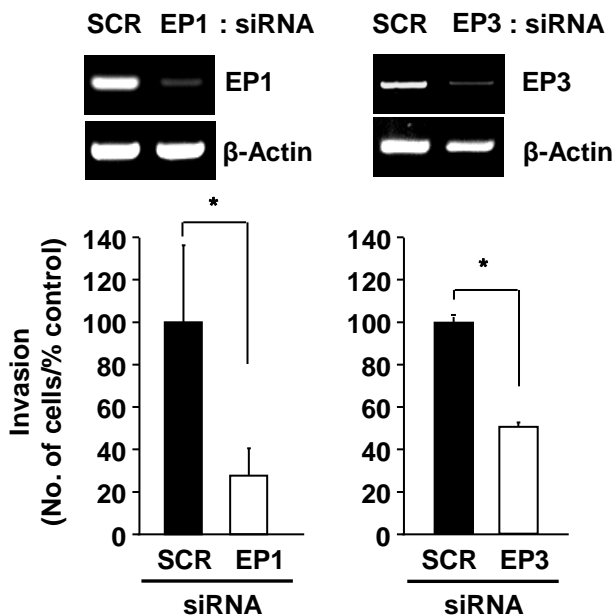**D**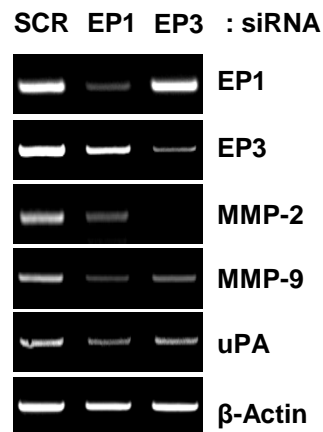**E**

| 17-PT-PGE2 | Sulprostone | PGE <sub>2</sub> | AH6809 |
|------------|-------------|------------------|--------|
| -          | +           | -                | -      |
| -          | -           | +                | -      |
| -          | -           | -                | +      |
| -          | -           | -                | -      |

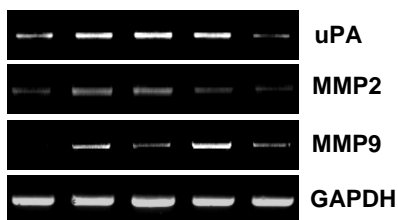

Supplement: MOESM6 [file 9462074]
